# Supplementary material
Source: MDPI journal article supplement (https://www.mdpi.com/2227-7102/13/6/600)
Supplement: s1 [file s1]

### Included Studies

1. Abrahamsen, G., Alvestad, M., Vassenden, A., & Thygesen, J. (2012). Perspektiver på kvalitet i barnehagen. [Perspectives on quality in ECEC]. *Barn-forskning om barn og barndom i Norden*, 30(2), 7–22. <https://doi.org/10.5324/barn.v30i2.3893>.
2. Alexandersen, N., Zachrisson, H. D., Wilhelmsen, T., Wang, M. V., & Brandlistuen, R. E. (2021). Predicting selection into ECEC of higher quality in a universal context: The role of parental education and income. *Early Childhood Research Quarterly*, 55, 336–348. <https://doi.org/10.1016/j.ecresq.2021.01.001>.
3. Alvestad, T., Bergem, H., & Eide, B., Johansson, J.E., Os, E., Pálmadóttir, H., Samuelsson, I.P., & Winger, N. (2014). Challenges and Dilemmas Expressed by Teachers Working in Toddler Groups in the Nordic Countries. *Early Child Development and Care*, 184(5), 671–688. <https://doi.org/10.1080/03004430.2013.807607>.
4. Alvestad, M., Gjems, L., Myrvang, E., Storli, J., Espedal, T. I. B., Lønning, V. K. & Bjørnstad, E. (2019). Kvalitet i barnehagen. [Quality in ECEC] Report nr.85. University of Stavanger. <http://hdl.handle.net/11250/2630132>.
5. Andenæs A. (2011). Chains of care: Organising the everyday life of young children attending day care. *Nordic Psychology*, 63(2), 49–67. <https://doi.org/10.1027/1901-2276/a000032>.
6. Aslanian, T. K., Andresen, A. K. & Baasland, T. (2020). Climbing, Hiding and Having Fun: Schoolchildren's Memories of Holistic Learning in a Norwegian Kindergarten. *Nordic Studies in Education*, 40(3), 268–285. <https://doi.org/10.23865/nse.v40.2447>.
7. Baustad, A.G. (2012). Using the Infant/Toddler Environment Rating Scale for examining the quality of care for infants and toddlers in Norwegian day care centers. *Nordisk barnehageforskning*, 5(2), 1–21. <https://doi.org/10.7577/nbf.313>.
8. Baustad, A. G. & Bjørnstad, E. (2020). Everyday interactions between staff and children aged 1–5 in Norwegian ECEC. *Early Years*. *Early Child Development and Care*, 184:5, 671–688, <https://doi.org/10.1080/03004430.2013.807607>.
9. Baustad, A.G, Rønning, W., & Bjørnstad, E. (2020). Norwegian ECEC staff's thinking on quality of interaction. *Early Child Development and Care*, 190(12), 1969–1982. <https://doi.org/10.1080/03004430.2018.1553874>.
10. Bekkhus, M., Rutter, M., Maughan, B., & Borge A.I.H. (2011). The effects of group daycare in the context of paid maternal leave and high-quality provision. *European Journal of Developmental Psychology*, 8(6), 681–696. <https://doi.org/10.1080/17405629.2011.602232>.
11. Bendiksen, S.Å. (2020). Unge tegnmakeres skrivelek i iscenesatte verksteder: En A/R/Tografisk studie. Young sign makers' writing play in staged workshops: An A/R/Tographic study]. Doctoral Dissertation, NTNU, Norway. <https://hdl.handle.net/11250/2652133> (accessed on 23 February 2022).
12. Bergsland, M.D. (2018). Barnehagens møte med minoritetsforeldre: En kritisk studie av anerkjennelsens og miskjennelsens tilblivelser og virkninger. [ECC meeting with minority parents: A critical study of acknowledgment and

- disacknowledgement allocation and effects]. Doctoral Dissertation, NTNU, Norway. <http://hdl.handle.net/11250/2491709> (accessed on 23 February 2022).
13. Birkeland, Å. (2020). Contradictory cultural formation ideals in a time of increased emphasis on individualization—a cross-cultural study of kindergarten practices in China and Norway. *Children's Exploration and Cultural Formation*, 47–63. In Hedegaard, M., & Eriksen Ødegaard, E. (2020). *Children's Exploration and Cultural Formation*. Springer Nature.
  14. Bjørnstad, E. & Os, E. (2018). Quality in Norwegian childcare for toddlers using ITERS-R. *European early childhood education research journal*, 26(1), 111–127. <https://doi.org/10.1080/1350293X.2018.1412051>.
  15. Bjørnstad, E., Broekhuizen, M. L., Os, E., & Baustad, A. G. (2020). Interaction Quality in Norwegian ECEC for Toddlers Measured with the Caregiver Interaction Profile (CIP) Scales. *Scandinavian journal of educational research*, 64(6), 901–920. <https://doi.org/10.1080/00313831.2019.1639813>.
  16. Brandlistuen, R.E., Helland, S.S., Evensen, L.A., Schjølberg, S., Tambs, K., Aase, H. & Wang, M.V. (2015). Sårbare barn i barnehagen—betydningen av kvalitet. [Vulnerable children in ECEC- the importance of quality]. Oslo: Nasjonalt folkehelseinstitutt. <https://www.fhi.no/globalassets/dokumenterfiler/rapporter/2015/sarbare-barn-i-barnehagen---betydningen-av-kvalitet-pdf.pdf> (accessed on 23 February 2022).
  17. Buøen, E.S., Lekhal, R., & Lydersen, S., Berg-Nielsen, T.S., Drugli, M.B., (2021). Promoting the Quality of Teacher-Toddler Interactions: A Randomized Controlled Trial of “Thrive by Three” In-Service Professional Development in 187 Norwegian Toddler Classrooms. *Frontiers in Psychology*, 12. <https://doi.org/10.3389/fpsyg.2021.778777>.
  18. Bøe, M. (2016). Personalledelse som hybride praksiser – et kvalitativt og tolkende skyggestudie av pedagogiske ledere i barnehagen. [Hybrid leadership – a qualitative and interpretive shadow study of pedagogical leaders in Kindergarten]. Doctoral Dissertation, NTNU, Norway. : <http://hdl.handle.net/11250/2396996> (accessed on 23 February 2022).
  19. Børhaug, K., & Lotsberg, D. Ø. (2010). Barnehageledelse i endring. [Changing pre-school management]. *Nordisk barnehageforskning*, 3(3). <https://doi.org/10.7577/nbf.277>.
  20. Børhaug, K. (2011). Barnehageorganisasjonen—autonomi eller standardisering. [Organizing preschools – Autonomy or standardization?]. *Tidsskriftet FoU i praksis*, 5(2), 49–66.
  21. Castell, N., Schneider, P., & Grossberndt, S., Fredriksen, M.F., Sousa-Santos, G., Vogt, M., Bartonova, A. (2018). Localized real-time information on outdoor air quality at kindergartens in Oslo, Norway using low-cost sensor nodes. *Environmental Research*, 165, 410–419. <https://doi.org/10.1016/j.envres.2017.10.019>.
  22. Davis, E., Freeman, R., Doherty, G., Karlsson, M., Everiss, L., Couch, J., Foote, L., Murray, P., Modigliani, K., Owen, S., Griffin, S. Friendly, M., McDonald, G., Bohanna, I., Corr, L., Smyth, L., Morkeseth, E., Morreaunet, S., Ogi, M., Fukukawa, S., & Hinke-Rahnau, J., (2012). An International Perspective on Regulated

- Family Day Care Systems. *Australasian Journal of Early Childhood*, 37(4), 127–137. <https://doi.org/10.1177/183693911203700418>.
23. Dearing, E., Zachrisson, H.D., & Mykletun, A., & Toppelberg, Claudio, O. (2018). Estimating the Consequences of Norway's National Scale-Up of Early Childhood Education and Care (Beginning in Infancy) for Early Language Skills. *AERA Open*, 4(1), <https://doi.org/10.1177/2332858418756598>.
  24. Drange, N., Havnes, T., & Sandsør, A. M.J. (2016). Kindergarten for all: Long run effects of a universal intervention. *Economics of Education Review*, 53, 164–181. <https://doi.org/10.1016/j.econedurev.2016.04.002>.
  25. Drange, N., & Rønning, M. (2020). Child care center quality and early child development. *Journal of Public Economics*, 188, 1–19 <https://doi.org/10.1016/j.jpubeco.2020.104204>.
  26. Drugli, M.B., & Undheim, M.A. (2012). Relationships between young children in full-time day care and their caregivers: A qualitative study of parental and caregiver perspectives. *Early Child Development and Care*, 182(9), 1155–1165. <https://doi.org/10.1080/03004430.2011.602190>.
  27. Drugli, M.B., & Undheim, A.M. (2012). Partnership between Parents and Caregivers of Young Children in Full-time Daycare. *Child Care in Practice*, 18(1), 51–65. <https://doi.org/10.1080/13575279.2011.621887>.
  28. Drugli, M.B., Solheim, E., & Lydersen, S., Moe, V., Smith, L., & Berg-Nielsen, T. (2018). Elevated cortisol levels in Norwegian toddlers in childcare. *Early Child Development and Care*, 188(12), 1682–1693. <https://doi.org/10.1080/03004430.2016.1278368>.
  29. Drugli, M.B., & Berg-Nielsen, T.S. (2019). Samspillskvalitet mellom ansatte og små barn (1–3 år) i norske barnehager (dagtilbud) [Quality of interaction between staff and young children (1–3 years) in Norwegian kindergartens] *Paideia*, (17), 37–47. [NTNU Open: Samspillskvalitet mellom ansatte og små barn \(1-3 år\) i norske barnehager](https://doi.org/10.1080/03004430.2016.1278368)
  30. Eide, B.J., Winger, N., & Wolf, K.R.D., & Dahle, H.F. (2017). Ei linerle vet at hun er ei linerle. En kvalitativ studie av små barns "wellbeing" i barnehagen [A wagtail bird knows she is a wagtail. A qualitative study of young children's wellbeing in kindergarten]. *Barn*, Volume. 1, p. 23–40. <https://doi.org/10.5324/barn.v35i1.3422>.
  31. Eide, B.J., Winger, N., & Wolf, K.D. (2019). Alt henger sammen—Hverdagslogistikk og små barns muligheter for tilhørighet i barnehagen [Everything is connected—Everyday logistics and young children's opportunities for belonging in kindergarten]. *Nordic Early Childhood Education Research Journal*. Volume 18, p. 1–15. <https://doi.org/10.7577/nbf.2688>.
  32. Eide, H. M., Kjærgård & Homme, A.D. (2019). Jo flere vi er sammen ...». En undersøkelse av organisering og arbeidsdeling i åtte barnehager med økt andel pedagoger [The more we are together ...". A study of organization and division of labour in eight kindergartens with an increased proportion of educators] NORCE Samfunn/Universitetet i Bergen i samarbeid med Stiftelsen Kanvas, Bergen kommune. P. 1–100.: <https://hdl.handle.net/1956/20759>. Accessed on 22 February 2022
  33. Eik, L.T. (2014). Ny i profesjonen: en observasjons- og intervjustudie av førskolelæreres videre kvalifisering det første året i yrket [New to the profession: an observational and interview

study of pre-school teachers' further qualification in their first year in the profession] Det utdanningsvitenskapelige fakultet, Universitetet i Oslo. draavhandling-eik.pdf (uio.no) Accessed on 8 June 2023

34. Eliassen, E., Zachrisson, H.D., & Melhuish, E. (2018). Is cognitive development at three years of age associated with ECEC quality in Norway? *European Early Childhood Education Research Journal*, 26(1), p. 97–110. <https://doi.org/10.1080/1350293X.2018.1412050>.
35. Evensen, J.H. (2020). Characteristics of educational language practices observed in four toddler groups in Norwegian ECEC. *International Journal of Early Years Education*, 28(4), p. 382–396. <https://doi.org/10.1080/09669760.2018.1548347>.
36. Fløtten, K.A.Ø. (2016). og så fikk dem se en rein! Ulike tilnærminger til hverdagslig pedagogisk virksomhet i barnehager i samisk-lulesamisk område i Norge. [and then they saw a reindeer! Different approaches to everyday pedagogical activities in kindergartens in the Sami-Lulesami area in Norway] *Nordisk barnehageforskning*, 12, p.1–20. <https://doi.org/10.7577/nbf.1564>.
37. Franck K. (2021). The educational context in expert assessments. A study of special education documents of children in ECEC institutions. *European Journal of Special Needs Education*, p. 819–833. <https://doi.org/10.1080/08856257.2021.1954346>.
38. Fredriksen, B.C. (2012). Providing materials and spaces for the negotiation of meaning in explorative play: Teachers' responsibilities. *Education Inquiry*, 3(3), p. 335–352. <https://doi.org/10.3402/edui.v3i3.22039>.
39. Furholt, A. (2018). Kunstnarar i barnehagen—estetiske erfaringar av høg kvalitet? [Artists in kindergarten—high quality aesthetic experiences?] *Nordisk barnehageforskning*, 17(1), p. 1–16. <https://doi.org/10.7577/nbf.1794>.
40. Gjems L. (2010). Teachers talking to young children: Invitations to negotiate meaning in everyday conversations. *European Early Childhood Education Research Journal*, 18(2), p. 139–148. <https://doi.org/10.1080/13502931003784479>.
41. Gotvassli, K.Å., & Vannebo, B.I. (2016). Kvalitet som masteridé i barnehagesektoren. [Quality as a master idea in the ECEC sector] *Nordisk tidsskrift for pedagogikk & kritikk*, Vol. 2, p. 1–15. <https://doi.org/10.17585/ntpk.v2.131>.
42. Grindheim, L.T. (2014). Kvardagslivet til barneborgarar: Ein studie av barna si deltaking i tre norske barnehagar [everyday life of child citizens: A study of children's participation in three Norwegian kindergartens]. NTNU. <http://hdl.handle.net/11250/273981> (accessed on 22 February 2022).
43. Grindheim L T. (2020). Conflict Analyses: A Methodology for Exploring Children's Cultural Formation in Early Childhood Education. *International Perspectives on Early Childhood Education and Development*, p. 65–81. [https://link.springer.com/chapter/10.1007/978-3-030-36271-3\\_5](https://link.springer.com/chapter/10.1007/978-3-030-36271-3_5)
44. Grøver, V., Lawrence, J., & Rydland, V. (2018). Bilingual preschool children's second-language vocabulary development: The role of first-language vocabulary skills and second-language talk input. *International Journal of Bilingualism*, 22(2), 234–250. <https://www.duo.uio.no/bitstream/handle/10852/52727/1/Bilingual-Preschool-Childrens-Second-Language-Vocabulary-Development.pdf> (accessed on 23 February 2022).

45. Gulbrandsen, L. & Eliassen, E. (2013). *Kvalitet i barnehager: rapport fra en undersøkelse av strukturell kvalitet*. Norsk institutt for forskning om oppvekst, velferd og aldring. [https://oda.oslomet.no/oda-xmlui/bitstream/handle/20.500.12199/5062/6157\\_1.pdf?sequence=1&isAllowed=y](https://oda.oslomet.no/oda-xmlui/bitstream/handle/20.500.12199/5062/6157_1.pdf?sequence=1&isAllowed=y) (accessed on 23 February 2022).
46. Hansen, J.E. (2018). Educational language practices and language development in early childhood education and care. [https://uis.brage.unit.no/uis-xmlui/bitstream/handle/11250/2712081/Joakim\\_E\\_Hansen\\_PhDopen.pdf?sequence=1](https://uis.brage.unit.no/uis-xmlui/bitstream/handle/11250/2712081/Joakim_E_Hansen_PhDopen.pdf?sequence=1) (accessed on 23 February 2022).
47. Hansen, J.E., & Alvestad, M. (2018). Educational language practices described by preschool teachers in Norwegian kindergartens. *European Early Childhood Education Research Journal*, 26(1), 128–141. <https://doi.org/10.1080/1350293X.2018.1412052>.
48. Hansen, J.E., & Broekhuizen, M.L. (2021). Quality of the Language-Learning Environment and Vocabulary Development in Early Childhood. *Scandinavian Journal of Educational Research*, 65(2), 302–317. <https://doi.org/10.1080/00313831.2019.1705894>.
49. Hanssen, N.B. (2018). Special educational needs in Norwegian and Belarusian preschools. *PhD dissertation. Nord University (Bodø)*.
50. Hatlem, M. (2014). Alle barn har rett til et inkluderende barnehagetilbud – om å begynne og ikke slutte, men kontinuerlig jobbe mot kvalitet og mangfold i barnehagens flerkulturelle og flerspråklige praksis: utviklingsprosjekt 2008–2013 [*All children have the right to inclusive ECEC—starting and not stopping, but continuously working towards quality and diversity in multicultural and multilingual ECEC practice: development project 2008–2013*]. <http://hdl.handle.net/11250/191398> (accessed on 23 February 2022).
51. Haugset, A.S. (2019). Har kommunalt eller privat eierskap betydning for kvaliteten i norske barnehager? [Does municipal or private ownership matter for the quality of Norwegian kindergartens?] *Tidsskrift for velferdsforskning*, 22(3), 240–254. <https://doi.org/10.18261/issn.2464-3076-2019-03-05>.
52. Haugset, A.S. (2021). Negotiating the value of “corporations’ capital” in Norwegian Early Childhood Education and Care provision. *Nordic Journal of Studies in Educational Policy*, p. 30–41. : <https://www.tandfonline.com/action/showCitFormats?doi=10.1080/020020317.2021.1989204> (accessed on 23 February 2022).
53. Heikka, J., Hognestad, K., Kettukangas, T., Bøe, M., & Ranta, S. (2020). Reviewing early childhood education teachers as leaders in Finland and Norway: Governance and professionalism. *Early Childhood Teachers: Global Practices, Challenges and Prospects*, 39–84.
54. Hernes, L., Myrvold, T. Gulpinar, T., Os, E., Winger, N., & Zeiner, H.H. (2021). *Mulighetenes barnehage. Kvalitet i Oslo kommunes barnehager*. OsloMet-Storbyuniversitetet. Samarbeidsrapport NIBR-BLU 2021. Samarbeidsrapport NIBR-BLU 2021.pdf (oslomet.no) (accessed on 8 June 2023).
55. Hundeland, P.S., Carlsen, M., & Erfjord, I. (2020). Qualities of mathematical discourses in kindergartens. *ZDM—Mathematics Education*, 52(4), p. 691–702. <https://doi.org/10.1007/s11858-020-01146-w>.
56. Jones, L., Rossholt, N., Anastasiou, T., & Holmes, R. (2016). Masticating @quality’ and spitting the bits out. *Contemporary Issues*

- in *Early Childhood*, 17(1), 26–38.  
<http://dx.doi.org/10.1177/1463949115627897>.
57. Kangas, J., Ukkonen-Mikkola, T., & Harju-Luukkainen, H., Ranta, S., Chydenius, H., Lahdenperä, J., Neitola, M., Kinon, J., Sajaniemi, N., Ruokonen, I. (2021). Understanding different approaches to ece pedagogy through tensions. *Education Sciences*, 11(12), p. 2–14. <https://doi.org/10.3390/educsci11120790>.
  58. Kleppe, R. (2018). Characteristics of staff–child interaction in 1–3-year-olds’ risky play in early childhood education and care. *Early Child Development and Care*, 188(10), 1487-1501. <http://doi.org/10.1080/03004430.2016.1273909>.
  59. Kleppe, R. (2018). Affordances for 1- to 3-year-olds’ risky play in Early Childhood Education and Care. *Journal of Early Childhood Research*, 16(3), 258-275. <https://doi.org/10.1177/1476718X18762237>.
  60. Kleppe, R., & Bjørnstad, E., (2019). Økt barnehagelærertetthet og hverdagskvalitet i barnehagen [increased teacher density and quality of everyday life in Kindergarten]. Oslo: OsloMet – storbyuniversitetet Skriftserie 2019 nr 7. Visning av Økt barnehagelærertetthet og hverdagskvalitet i barnehagen (oslomet.no).
  61. Klette, T., Drugli, M.B., & Aandahl, A.M. (2018). Together and alone a study of interactions between toddlers and childcare providers during mealtime in Norwegian childcare centres. *Early Child Development and Care*, 188(3), 387-398. <http://dx.doi.org/10.1080/03004430.2016.1220943>.
  62. Lekhal, R. et al., (2013). *Variasjon i barnehagekvalitet: Den norske mor og barn-undersøkelsen: beskrivelser fra første datainnsamling fra barnehagene* [Variation in kindergarten quality: The Norwegian mother and child survey : descriptions from the first data collection from kindergartens] Variasjon i barnehagekvalitet—FHI Accessed on 8 June 2023
  63. Lekhal, R., Drugli, M.B., & Berg-Nielsen, T.S., & Buøen, E.S. (2020). A model of intervention and implementation of quality building and quality control in childcare centers to strengthen the mental health and development of 1-3-year olds: Protocol for a randomized controlled trial of thrive by three. *JMIR Research Protocols*, 9(10), p. 1–12. <http://dx.doi.org/10.2196/17726>.
  64. Lekhal, R., Vigmostad, I., & Norge Fylkesmannen i; Oppland; (2014). *Trivsel og kvalitet i barnehagen [well-being and quality in early childhood education and care]* Oppdragsrapport nr. 6–2014, p. 1-63 Høgskolen i Hedmark. Brage INN: Trivsel og kvalitet i barnehagen (accessed on 8 June 2023)
  65. Lekhal, R., Von Soest, T., Wang, M.V., Aukrust, V.G., & Schjølberg, S. (2012). Norway’s high-quality center care reduces late talking in high-and low-risk groups. *Journal of Developmental and Behavioral Pediatrics*, 33(7), 562-569. <https://doi.org/10.1097/dbp.0b013e3182648727>.
  66. Lekhal, R., Zachrisson, H.D., Wang, M.V., Schjølberg, S., von Soest, T. (2011). Does universally accessible child care protect children from late talking? Results from a Norwegian population-based prospective study. *Early Child Development and Care*, 181(8), 1007-1019. <http://dx.doi.org/10.1080/03004430.2010.508558>.
  67. Little, H., Sandseter, E.B.H. & Wyver, S. (2012). Early Childhood Teachers’ Beliefs about Children’s Risky Play in Australia and Norway. *Contemporary Issues in Early Childhood*, 13(4), 300-316. <https://doi.org/10.2304/ciec.2012.13.4.300>.

68. Lytje, M., Dyregrov, A., Bergstrøm, M.D., Fjærestad, A., Fisher-Hoyrem, L. (2021). Same origin, different implementations: a document analysis of Norwegian and Danish bereavement response plans. *International Journal of Early Years Education*, p. 1-15. <https://doi.org/10.1080/09669760.2021.1902787>Løkken, I.M., Bjørnstad, E., Broekhuizen, M.L., & Moser, T. (2018). The relationship between structural factors and interaction quality in Norwegian ECEC for toddlers. *International journal of child care and education policy*, 12, p. 1-15. <https://doi.org/10.1186/s40723-018-0048-z>.
69. Løkken, I. M., Bjørnstad, E., Broekhuizen, M. L., & Moser, T. (2018). The relationship between structural factors and interaction quality in Norwegian ECEC for toddlers [Article]. *International Journal of Child Care and Education Policy*, 12(1), Article 9. <https://doi.org/10.1186/s40723-018-0048-z>.
70. Martinsen, M.T. (2015). Structural conditions for children's play in kindergarten. *Nordisk barnehageforskning*, 10, (1), p. 1-18. <https://doi.org/10.7577/nbf.1426>.
71. Moe, T. (2015). Når ledelse gjør forskjell-Ledelse som virkemiddel for å styrke samarbeidet mellom barnevern og barnehage for implementering av tidlig intervensjon [When leadership makes a difference-Leadership as a tool to strengthen cooperation between child protection and ECEC for the implementation of early intervention]. *Tidsskriftet Norges barnevern*, 92(1), 6-27. <https://doi.org/10.18261/ISSN1891-1838-2015-01-02>.
72. Moser, T. & Martinsen, M.T. (2010). The outdoor environment in Norwegian kindergartens as pedagogical space for toddlers' play, learning and development. *European Early Childhood Education Research Journal*, 18(4), 457-471. <https://doi.org/10.1080/1350293X.2010.525931>.
73. Nilsen, T.R. (2021). Pedagogical intentions or practical considerations when facilitating children's play? Teachers' beliefs about the availability of play materials in the indoor ECEC environment. *International Journal of Child Care and Education Policy*, 15(1). <http://dx.doi.org/10.1186/s40723-020-00078-y>.
74. Nygård, M. (2015). Kvalitet i læring i barnehagen. En analyse av styringsdokumenter fra OECD og Norge [Quality of learning in early childhood education and care. An analysis of policy documents from OECD and Norway]. *Nordisk barnehageforskning*, 11, 11(7), p. 1-18, published 6th of October 2015. <https://doi.org/10.7577/nbf.856>.
75. Omdal, H. (2018). Creating teacher capacity in Early Childhood Education and Care institutions implementing an authoritative adult style. *Journal of Educational Change*, 19(1), 103-129. <https://doi.org/10.1007/s10833-017-9315-y>.
76. Puroila, A.M, Emilson, A., Pálmadóttir, H., Piškur, B., & Tofteland, B. (2021). Educators' interpretations of children's belonging across borders: Thinking and talking with an image. *European Educational Research Journal*, 1-22. <https://doi.org/10.1177/14749041211065878>.
77. Rege, M., Solli, I.F., Størksen, I., Votruba, M. (2018). Variation in center quality in a universal publicly subsidized and regulated childcare system. *Labour Economics*, 55, 230-240. <https://doi.org/10.1016/j.labeco.2018.10.003>.
78. Sando, O.J. (2021). Places for Children: The Role of the Physical Environment in Young Children's Well-being and Physical

- Activity. [Doktorgradsavhandling, Norges teknisknaturvitenskapelige universitet]. NTNU Open.
79. Seljeseth, J. (2016). De minste barnas lek er et dikt: Lek og lyrikk som modell for teater for de minste. *BARN-Forskning om barn og barndom i Norden*, 34(2), 1–13. <https://doi.org/10.5324/barn.v34i2.3620>.
  80. Skreland, L.L. (2016). På mandager er det ikke lov med papirfly en studie av regler og yrkesutøvelse (Doktorgradsavhandling). [On Mondays, paper airplanes are not allowed: a study of rules and professional practice]. *Universitetet i Agder*. <https://www.nb-ecec.org/no/artikler/article-57>. Accessed on 23 February 2022:
  81. Stokke, A. (2012). Et blikk på barns vilkår for fysisk aktivitet inne i barnehager: En komparativ studie, 1981 og 2009. [A look at children's conditions for physical activity inside kindergartens: A comparative study, 1981 and 2009]. *BARN-Forskning om barn og barndom i Norden*, 30(1), 37–54. <https://tidsskriftetbarn.no/index.php/barn/article/view/4739/7384> (accessed on 23 February 2022).
  82. Tholin, K.R. (2019). Å være pålogget og aktivt til stede: Hvordan fremstiller framtidige barnehagelærere omsorg i barnehagen? [Being logged in and actively present: How do future kindergarten teachers portray care in kindergarten?]. *Norsk pedagogisk tidsskrift*, 103(2-03), 133–144.
  83. Trætteberg, H.S., & Fladmoe, A. (2020). Quality Differences of Public, For-Profit and Nonprofit Providers in Scandinavian Welfare? User Satisfaction in Kindergartens. *Voluntas*, 31(1), 153–167. <https://doi.org/10.1007/s11266-019-00169-6>.
  84. Tuastad, S.E., Bjørnstad, E. & Alvestad, M. (2019). Contested quality: The struggle over quality, play and preschooling in Norwegian early childhood education and care. *Policification of Early Childhood Education and Care: Early Childhood Education in the 21st Century* (3), 154–174. <https://doi.org/10.1007/s11266-019-00169-6>.
  85. Undheim, A.M., & Drugli, M.B. (2012). Experiences with Full-Time Child Care Attendance on Young Children in Norway: Parents' and Early Childhood Teachers' Views. *International Research in Early Childhood Education*, 3(1), 1-16
  86. Vallberg, Roth, A.K. (2014). Nordic Comparative Analysis of Guidelines for Quality and Content in Early Childhood Education. *Nordisk barnehageforskning*, 8(1), 1-35. <https://doi.org/10.7577/nbf.693>.
  87. van Trijp, C.P.J., Lekhal, R., Drugli, M.B., Rydland, V., & Solheim Buøen, E. (2021). Validation of the Leiden Inventory for the Child's Well-Being in Daycare (LICW-D) Questionnaire in Norwegian Early Childhood Education and Care Centers. *Frontiers in Psychology* (12), 1-10. <https://doi.org/10.3389/fpsyg.2021.767137>.
  88. van Trijp, C.P.J., Lekhal, R., Drugli, M.B., Rydland, V., van Gils, S., Vermeer, H.J., & Buøen, E.S. (2021). The Association Between Toddlers' Temperament and Well-Being in Norwegian Early Childhood Education and Care, and the Moderating Effect of Center-Based Daycare Process Quality. *Frontiers in Psychology*, 12, 1-12. <https://doi.org/10.3389/fpsyg.2021.763682>.
  89. Vandekerckhove, A. & Aarssen, J. (2020). High Time to Put the Invisible Children on the Agenda: Supporting Refugee Families and Children through Quality ECEC. *European Early Childhood*



- Education Research Journal*, 28(1), 104-114.  
<https://doi.org/10.1080/1350293X.2020.1707366>.
90. Vassenden, A., Thygesen, J., Bayer, S.B., Alvestad, M. og Abrahamsen, G. (2011). *Barnehagenes organisering og strukturelle faktorerers betydning for kvalitet*. [The organization of kindergartens and the impact of structural factors on quality]. International Research Institute of Stavanger. :  
[https://www.regjeringen.no/globalassets/upload/kd/vedlegg/rapporter/iris\\_rapport.pdf](https://www.regjeringen.no/globalassets/upload/kd/vedlegg/rapporter/iris_rapport.pdf). Accessed on 23 February 2022
  91. Vist, T. & Os, E. (2020). Music education through the lens of ITERS-R: Discussing results from 206 toddler day care groups. *Research Studies in Music Education*, 42(3), 326–346.  
<https://doi.org/10.1177/1321103X19828785>.
  92. Winger, N. & Eide, B.J. (2015). Nytråkk i gamle spor. Retrospektivt blikk på hverdagslivet i en småbarnsgruppe. [New steps in old tracks. A retrospective look at everyday life in a toddler group]. *Nordisk barnehageforskning*, (9), 1–22.  
<https://doi.org/10.7577/nbf.688>.
  93. Wolf, K.D. (2020). *Alle foreldre med? Syn på kvalitet og samarbeid i barnehagen*. [All parents involved? Views on quality and cooperation in kindergarten]. OsloMet – Storbyuniversitetet. :  
<https://oda.oslomet.no/oda-xmlui/bitstream/handle/10642/9246/A-20-25-manus-Wolf-publisert.pdf?sequence=3&isAllowed=y>. Accessed on 23 February 2022
  94. Zachrisson, H.D., & Dearing, E. (2015). Family Income Dynamics, Early Childhood Education and Care, and Early Child Behavior Problems in Norway. *Child Development*, 86(2), 425–440.  
<https://doi.org/10.1111/cdev.12306>.
  95. Zachrisson, H. D., Dearing, E., & Lekhal, R., Toppelberg, C.O., (2013). Little evidence that time in child care causes externalizing problems during early childhood in Norway. *Child Development*, 84(4), 1152–1170. <https://doi.org/10.1111/cdev.12040>.
  96. Zambrana, I.M., Dearing, E., & Nærde, A., Zachrisson, H.D. (2016). Time in Early Childhood Education and Care and Language Competence in Norwegian Four-Year-Old Girls and Boys. *European Early Childhood Education Research Journal*, 24(6), 793–806.  
<https://doi.org/10.1080/1350293X.2015.1035538>.
  97. Aasen, W., & Sadownik, A.R. (2019). Does the new kindergarten teacher education program in Norway provide good conditions for professional kindergarten teachers? *Universal Journal of Educational Research*, 7(9 A), 1–7.  
<https://doi.org/10.13189/ujer.2019.071301>.
